# Supplementary material for: Colorectal cancer development is affected by the ECM molecule EMILIN-2 hinging on macrophage polarization via the TLR-4/MyD88 pathway
Source: PubMed Central journal article supplement (PMC8840294; doi:10.1186/s13046-022-02271-y), 2022-02-11
Supplement: 13046_2022_2271_MOESM1_ESM.pdf [file 13046_2022_2271_MOESM1_ESM.pdf]

**Table S1.** Clinic-pathological characteristics of patients.

| <b>Variables</b>                               | <b>N.<br/>(23 tot)</b> | <b>%</b> |
|------------------------------------------------|------------------------|----------|
| <b>Sex</b>                                     |                        |          |
| • M                                            | 12                     | 52       |
| • F                                            | 11                     | 48       |
| <b>Age</b>                                     |                        |          |
| • <65                                          | 14                     | 61       |
| • >=65                                         | 9                      | 39       |
| <b>Stage pre-treatment</b>                     |                        |          |
| • II                                           | 6                      | 26       |
| • III                                          | 12                     | 52       |
| • IV                                           | 5                      | 22       |
| <b>Resection</b>                               | 23                     | 100      |
| <b>Stage post-treatment<sup>1</sup></b>        |                        |          |
| • pCR                                          | 3                      | 13       |
| • II                                           | 4                      | 17       |
| • III                                          | 8                      | 35       |
| <b>Lymph invol. Post-treatment<sup>1</sup></b> |                        |          |
| • No                                           | 7                      | 30       |
| • Yes                                          | 8                      | 35       |
| <b>TRG<sup>1</sup></b>                         |                        |          |
| • 1                                            | 3                      | 13       |
| • 2                                            | 2                      | 9        |
| • 3                                            | 6                      | 26       |
| • 4                                            | 2                      | 9        |
| <b>pCR<sup>1</sup></b>                         |                        |          |
| • No                                           | 10                     | 43       |
| • Yes                                          | 5                      | 22       |
| <b>Adj CT<sup>1</sup></b>                      |                        |          |
| • No                                           | 6                      | 40       |
| • Yes                                          | 9                      | 60       |
| <b>Metastatic<sup>1</sup></b>                  |                        |          |
| • No                                           | 10                     | 43       |
| • Yes                                          | 4                      | 17       |
| <b>Number of M. sites<sup>1</sup></b>          |                        |          |
| • 0                                            | 10                     | 43       |
| • 1                                            | 2                      | 9        |
| • 2                                            | 1                      | 4        |
| <b>Status<sup>1</sup></b>                      |                        |          |
| • Alive                                        | 12                     | 52       |
| • Dead                                         | 2                      | 9        |

<sup>1</sup>This information was not available for all the patients analyzed.
