# Supplementary material for: Colorectal cancer development is affected by the ECM molecule EMILIN-2 hinging on macrophage polarization via the TLR-4/MyD88 pathway
Source: PubMed Central journal article supplement (PMC8840294; doi:10.1186/s13046-022-02271-y), 2022-02-11
Supplement: 13046_2022_2271_MOESM2_ESM.pdf [file 13046_2022_2271_MOESM2_ESM.pdf]

**Table S2.** Oligonucleotides used for quantitative PCR analyses.

| Gene Name                       | Forward                | Reverse                    |
|---------------------------------|------------------------|----------------------------|
| <i>EMILIN-2</i>                 | TTGAAGACATTTGCCTGCTG   | AGTGAACCTACCCATGCCAG       |
| <i>hTLR-4</i>                   | ACCTGTCCCTGAACCCTATGAA | CTTCTAAACCAGCCAGACCTTG     |
| <i>Ifngr1</i>                   | TGCCTGTACCGACGAATGTT   | TCCAGGAACCCGAATACACC       |
| <i>IL10ra</i>                   | TGCATACGGGACAGAACTGC   | CAGGACAATGCCTGAGCCTT       |
| <i>IL-12</i>                    | GGAAGCACGGCAAGCAGAATA  | AACTTGAGGGAGAGAAGTAGGAATGG |
| <i>IL-1<math>\beta</math></i>   | TGCCACCTTTTGACAGTGATG  | TGATGTGCTGCTGCCGAGATT      |
| <i>IL4ra</i>                    | CCTCACACTCCACACCAATG   | AGCCTGGGTTCCCTGTAGGT       |
| <i>mArg-1</i>                   | GCTTGCTTCGGAACCTCAACG  | CTTGGGAGGAGAAGGCGTTT       |
| <i>mCCL2</i>                    | AGCTGTAGTTTTTGTACCAAGC | GTGCTGAAGACCTTAGGGCA       |
| <i>mCCL5</i>                    | TGCTGCTTTGCCTACCTCTC   | TCCTTCGAGTGACAAACACGA      |
| <i>mChil-3</i>                  | ACTTTGATGGCCTCAACCTG   | AATGATTCCTGCTCCTGTGG       |
| <i>mCMYC</i>                    | CACCAGCAGCGACTCTGAA    | CCCGACTCCGACCTCTTG         |
| <i>mCycD1</i>                   | CATCAAGTGTGACCCGGACTG  | CCTCCTCCTCAGTGGCCTTG       |
| <i>mGAPDH</i>                   | AGGTCGGTGTGAACGGATTTG  | TGTAGACCATGTAGTTGAGGTCA    |
| <i>mIFN-<math>\gamma</math></i> | CTTTGGACCCTCTGACTTGAG  | TCAATGACTGTGCCGTGG         |
| <i>mIL-6</i>                    | CAAAGCCAGAGTCCTTCAGAG  | GTCCTTAGCCACTCCTTCTG       |
| <i>mNOS-2</i>                   | CACCTTGAGTTCACCCAGT    | ACCACTCGTACTTGGGATGC       |
| <i>mTLR-4</i>                   | AGATCTGAGCTTCAACCCCTTG | GGTGGTGTAAGCCATGCCA        |
| <i>mTNF-<math>\alpha</math></i> | CTTCTGTCTACTGAACTTCGGG | CAGGCTTGCTCACTCGAATTTTG    |
| <i>PD-1</i>                     | TTCAGGTTTACCACAAGCTGG  | TGACAATAGGAAACCGGGAA       |
| <i>PD-L1</i>                    | GGAATTGTCTCAGAATGGTC   | GTAGTTGCTTCTAGGAAGGAG      |
| <i>Tnfrsf1a</i>                 | ACCGTGACAATCCCCTGTAA   | GTCCTGGGGGTTTGTGACAT       |
