# Supplementary material for: Colorectal cancer development is affected by the ECM molecule EMILIN-2 hinging on macrophage polarization via the TLR-4/MyD88 pathway
Source: PubMed Central journal article supplement (PMC8840294; doi:10.1186/s13046-022-02271-y), 2022-02-11
Supplement: 13046_2022_2271_MOESM4_ESM.pdf [file 13046_2022_2271_MOESM4_ESM.pdf]

**Figure S4**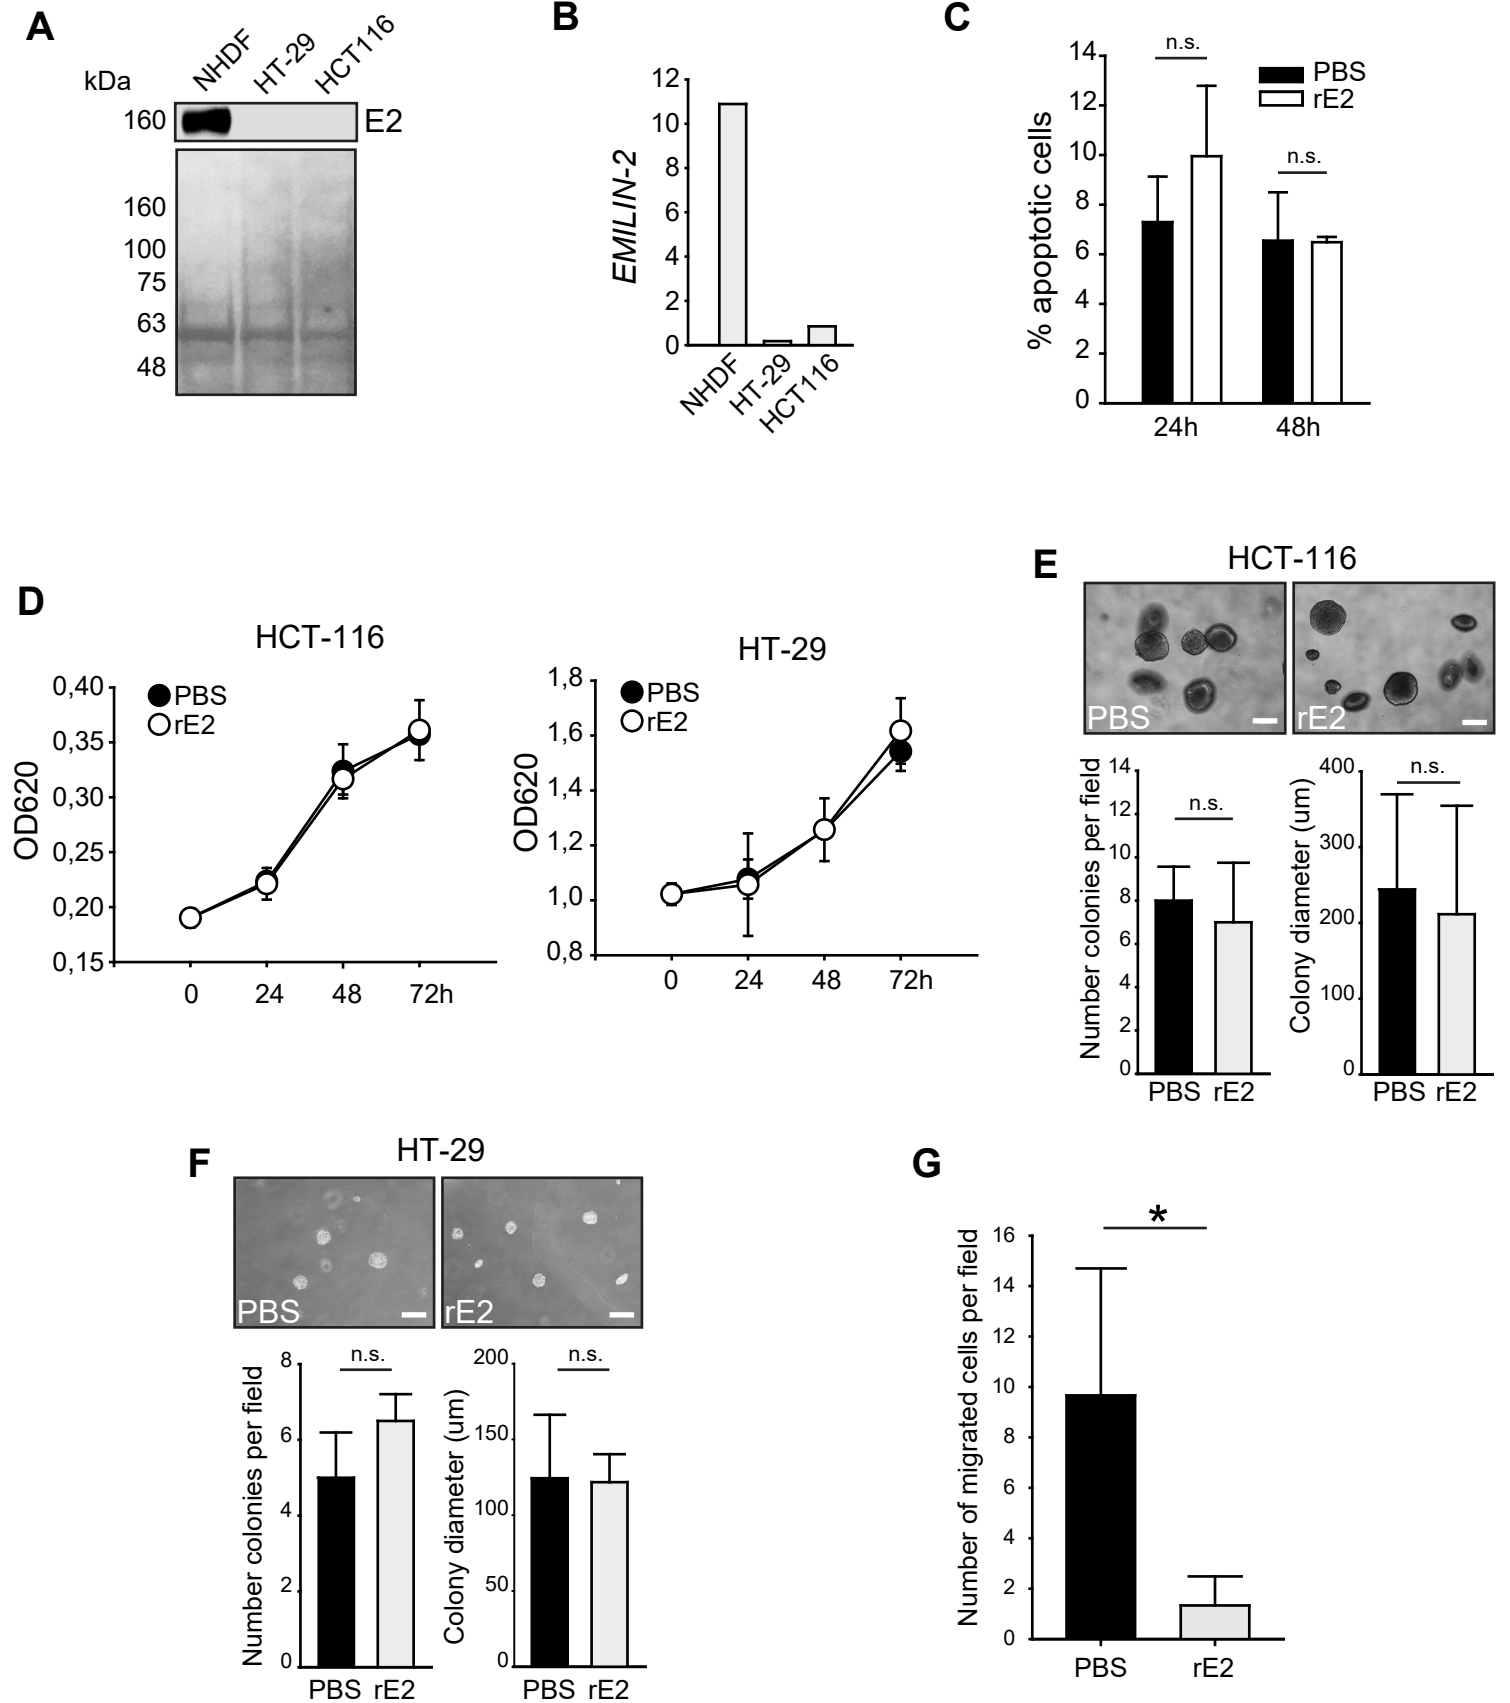

**Figure S4. EMILIN-2 does not affect CRC cell viability.** **A**, Western blot analysis of the EMILIN-2 (E2) expression in conditioned media (CM) from HT-29 and HCT-116 cells (top), the Ponceau-stained membrane indicates equal protein loading (bottom). CM from human fibroblasts (NHDF) was used as positive control. **B**, qPCR of the *EMILIN-2* (E2) expression, relative to that of *GAPDH*, in HT-29 and HCT-116 cells; human fibroblast (NHDF) were used as a positive control. **C**, Graph reporting the percentage of apoptotic HCT-116 cells challenged with recombinant EMILIN-2 (rE2) or vehicle (PBS), as assessed by TUNEL assay. **D**, Graph reporting the viability of HCT-116 and HT-29 cells challenged with recombinant EMILIN-2 (rE2) or vehicle (PBS), as assessed by MTT assay. **E**, Representative images (top) and quantification of the number and diameter (bottom) of the colonies formed by HCT-116 cells in 3D spheroid-based tests, following treatment with recombinant EMILIN-2 (rE2) or vehicle (PBS); scale bar=200  $\mu$ m. **F**, Representative images (top) and quantification of the number and diameter (bottom) of the colonies formed by HT-29 cells in 3D spheroid-based tests, following treatment with recombinant EMILIN-2 (rE2) or vehicle (PBS); scale bar=200  $\mu$ m. **G**, Graph reporting the number of migrated HCT-116 cells per field following treatment with recombinant EMILIN-2 (rE2) or vehicle (PBS), as assessed by transwell migration assays. Graphs represent the mean  $\pm$  SD; *P* values were obtained with the paired Student's t-test; \**P*<0.05, n.s.: *P*>0.05.

**Figure S5**

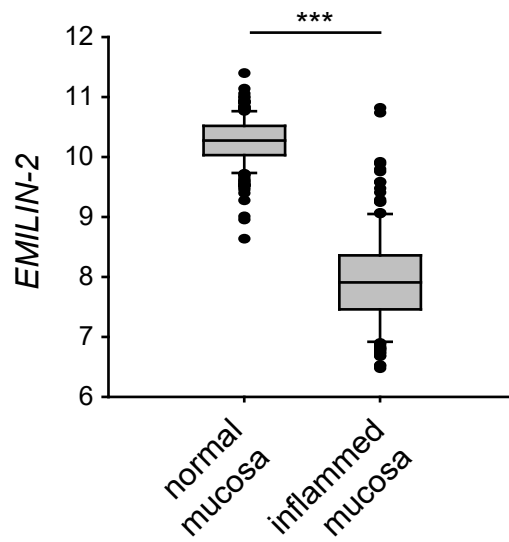

**Figure S5. *EMILIN-2* is down-regulated in patients affected by chronic inflammatory disease.** Evaluation of *EMILIN-2* gene expression in healthy and inflamed intestinal mucosa in the GEO public dataset (ID: GSE83687; healthy n=204, inflamed n=159). Graph represents the mean  $\pm$  SD; the *P* value was obtained using the paired Student's t-test; \*\*\**P*<0.001.

**Figure S6**

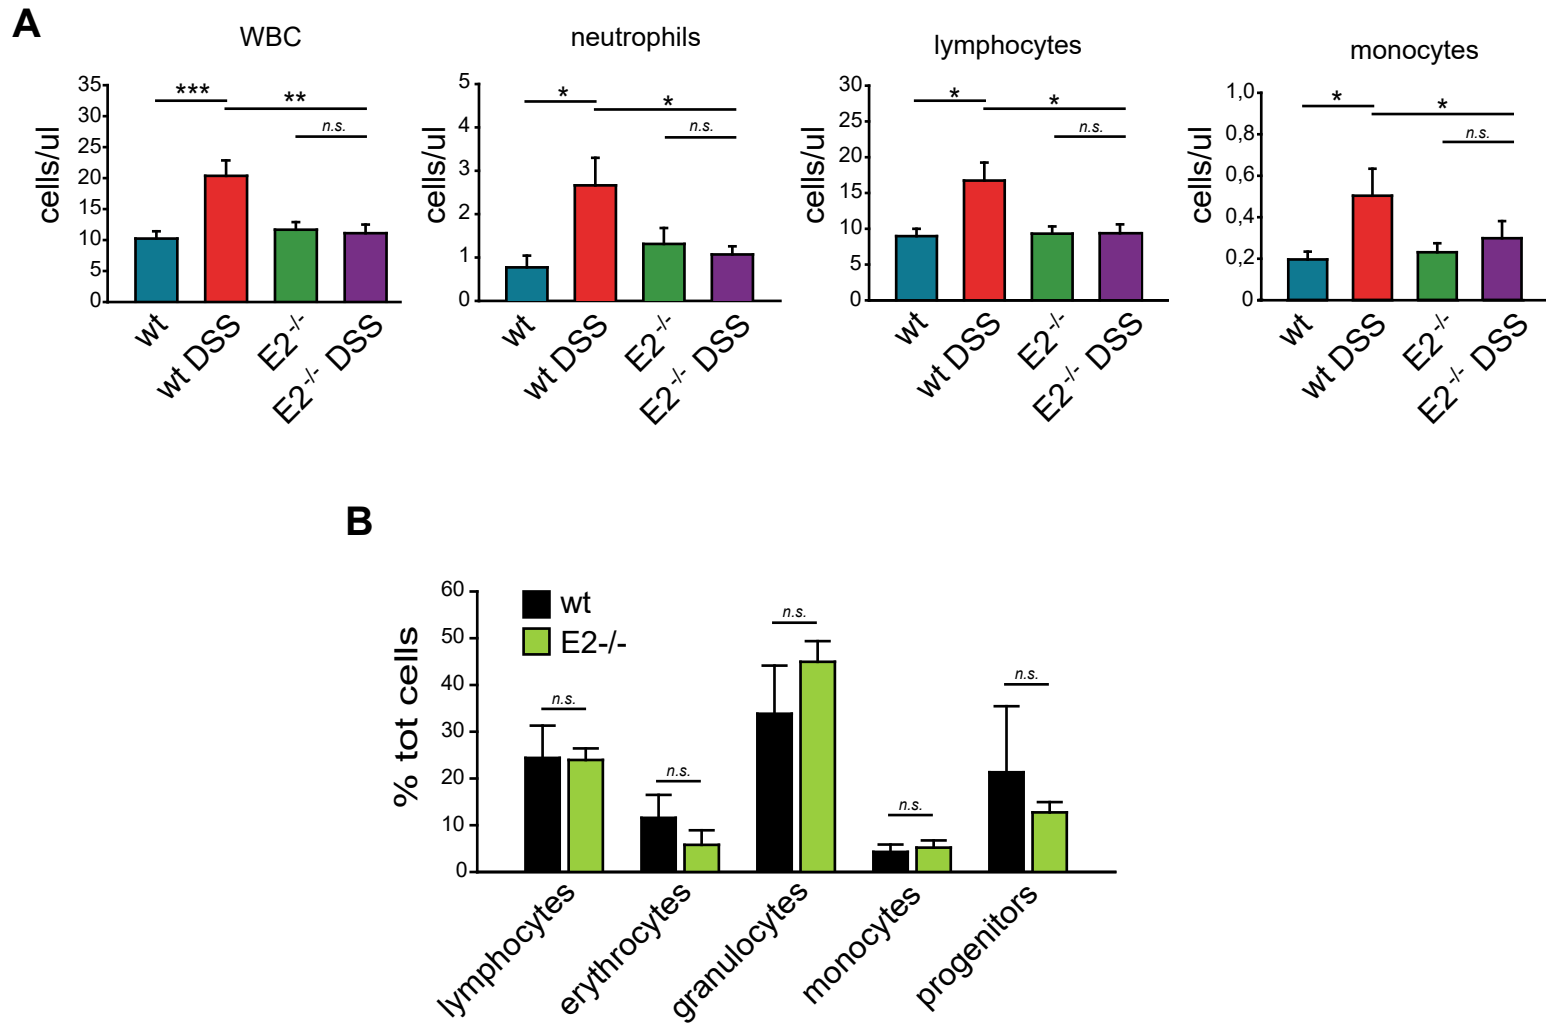

**Figure S6. Ablation of EMILIN-2 impairs the number of circulating monocytes upon DSS-induced inflammation.**

**A**, Graphs reporting the number ( $\times 10^3$ ) of circulating white blood cells (WBC), neutrophils, lymphocytes and monocytes in *wild type* (wt) and *Emilin-2*<sup>-/-</sup> (E2<sup>-/-</sup>) mice treated or not with DSS for 7 days; n=8. **B**, Graphs showing the percentage of hematopoietic progenitors in *wild type* (wt) and *Emilin-2*<sup>-/-</sup> (E2<sup>-/-</sup>) bone marrows, as assessed by flow cytometry; n=5. *P* values were obtained with the one-way ANOVA test. \**P*<0.05, \*\**P*<0.01, \*\*\**P*<0.001, n.s.: *P*>0.05.



**Figure S7**

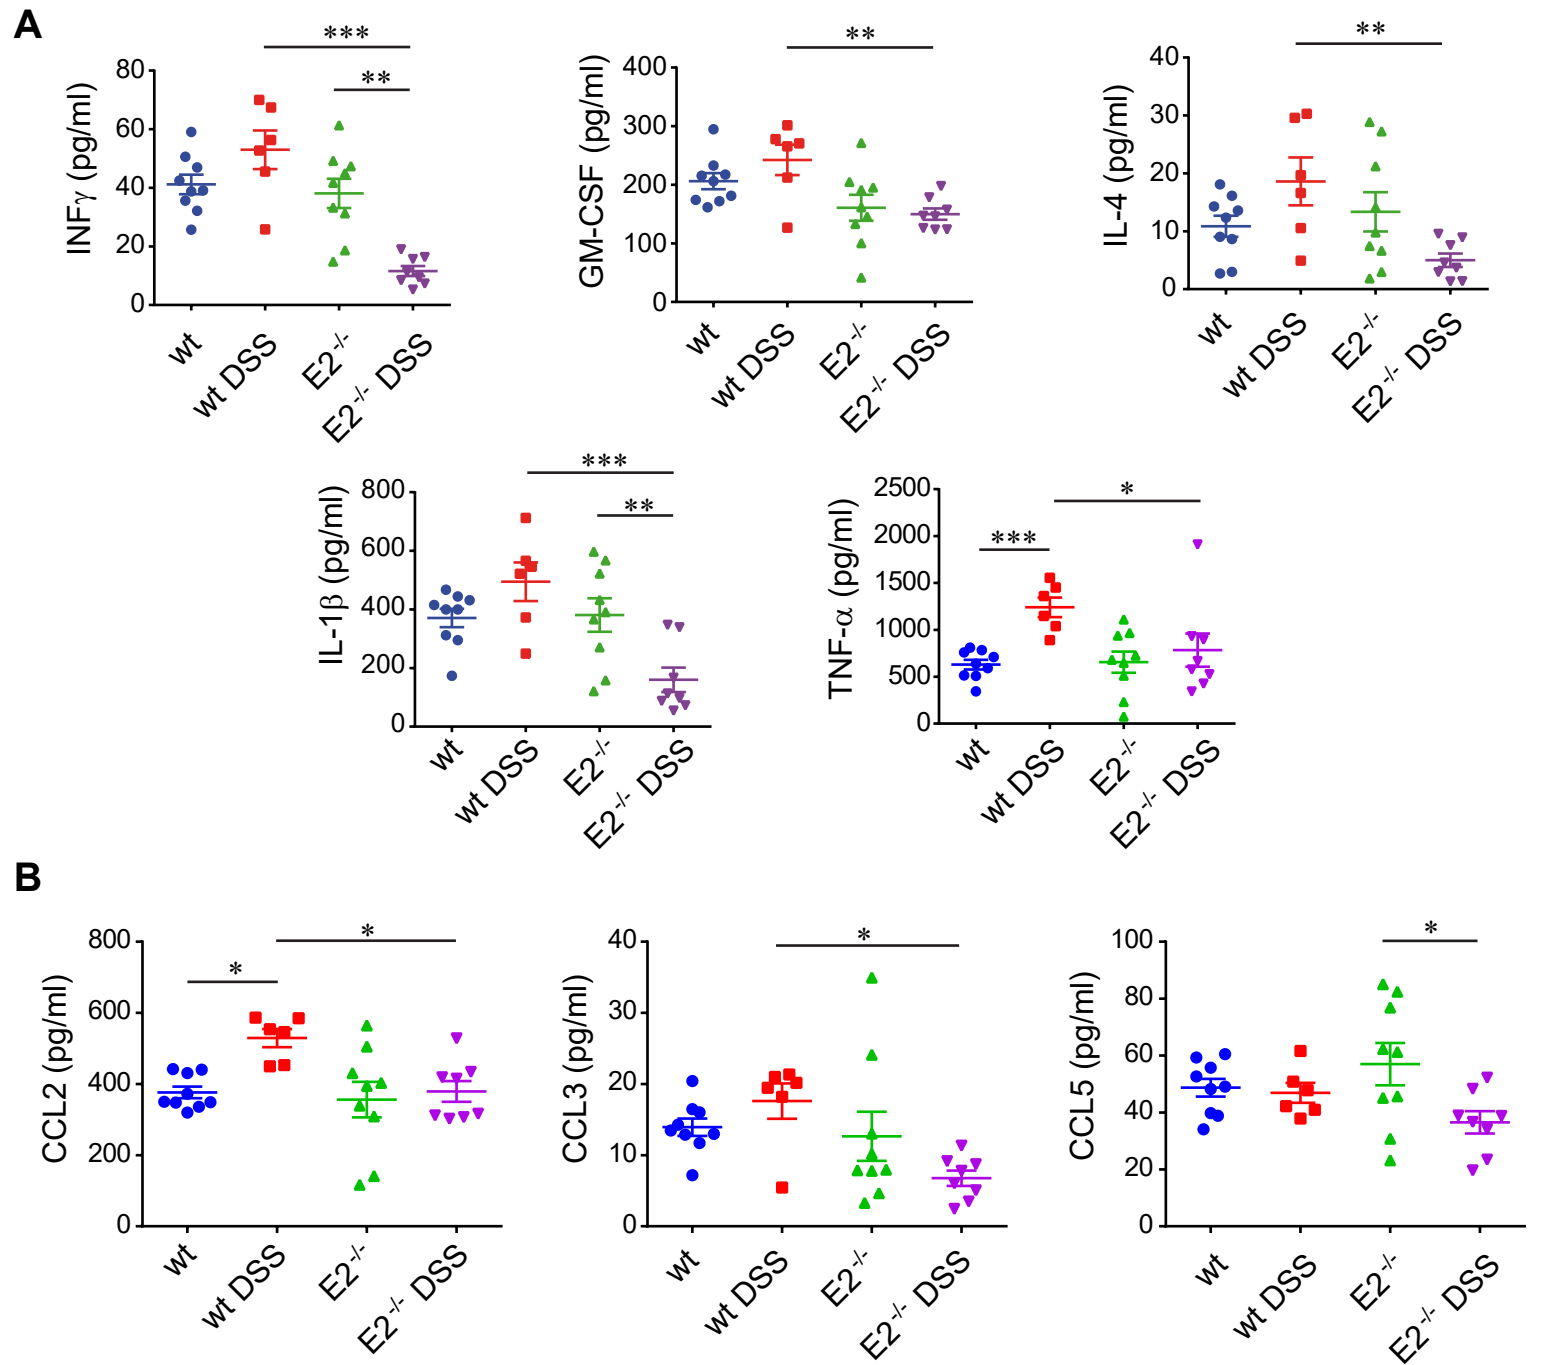

**Figure S7. EMILIN-2 affects the levels of circulating inflammatory cytokines and chemokines during DSS-induced inflammation.** **A**, Graphs reporting the concentration of key inflammatory cytokines in the sera from *wild type* (wt) and *Emilin-2*<sup>-/-</sup> (E2<sup>-/-</sup>) mice treated or not with DSS for 7 days. **B**, Graphs indicating the concentration of chemokines in the sera from *wild type* (wt) and *Emilin-2*<sup>-/-</sup> (E2<sup>-/-</sup>) mice treated or not with DSS for 7 days. Graphs represent the mean  $\pm$  SD; *P* values were obtained with the one-way ANOVA test. \* *P*<0.05, \*\**P*<0.01, \*\*\**P*<0.001.

Figure S8

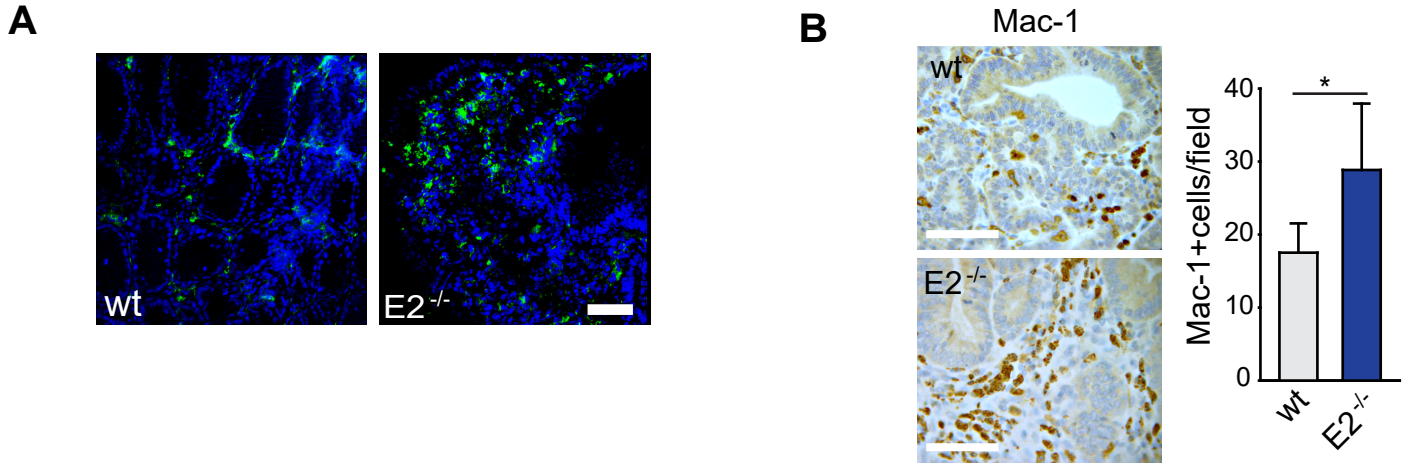

**Figure S8. EMILIN-2 affects macrophage recruitment in colorectal tumors.** **A**, Representative images of CD68 staining (green) in tumors from *wild type* (wt) and *Emilin-2*<sup>-/-</sup> (E2<sup>-/-</sup>) mice treated or not with AOM/DSS; blue: nuclei, scale bar=50  $\mu$ m. **B**, Representative images and quantification of Mac-1 positive cells (macrophages) in tumors from *wild type* (wt) and *Emilin-2*<sup>-/-</sup> (E2<sup>-/-</sup>) mice upon AOM-induced CRC; magnification 400x; scale bar=50  $\mu$ m; n=6. The graph represents the mean  $\pm$  SD; *P* values were obtained using the paired Student's t-test; \* *P*<0.05.

**Figure S9****A**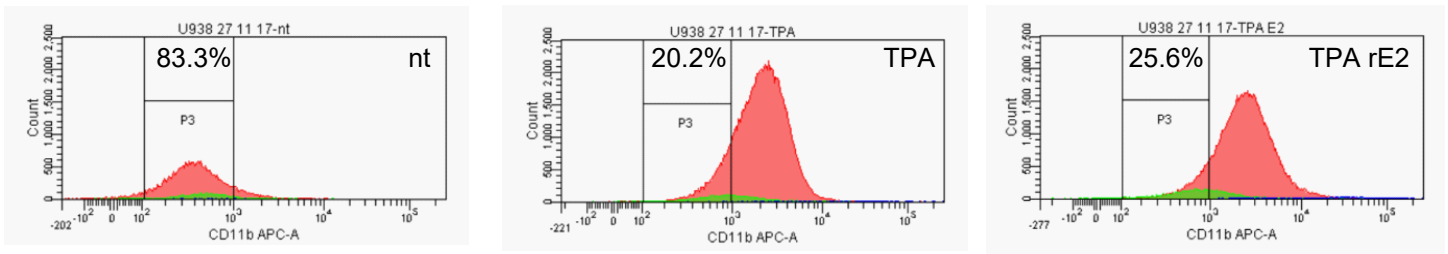**B**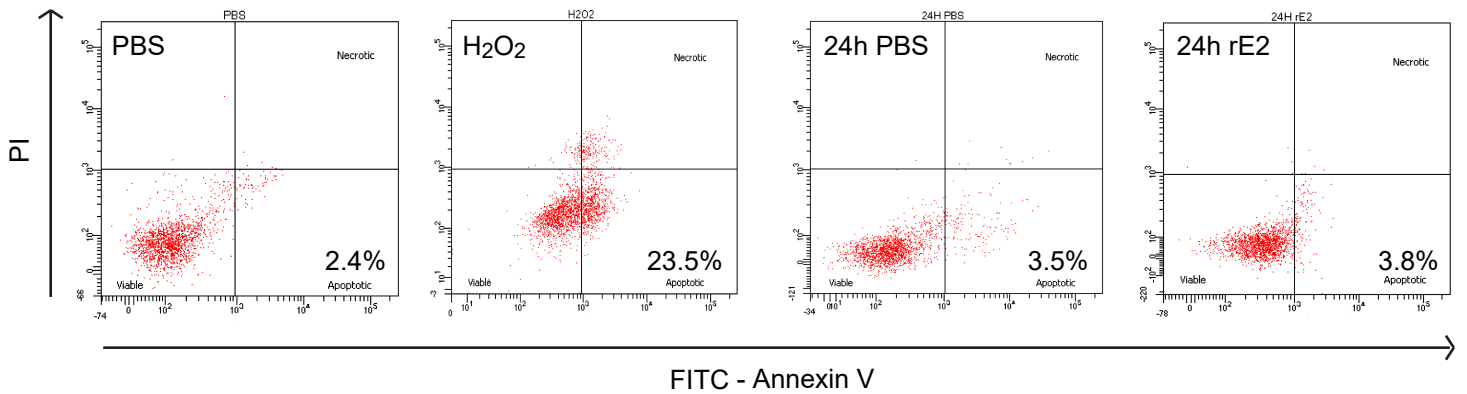**C**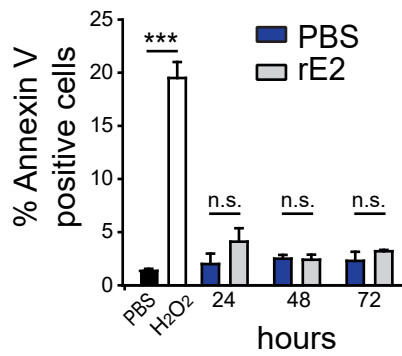**D**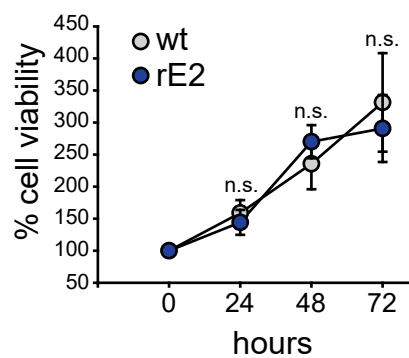**E**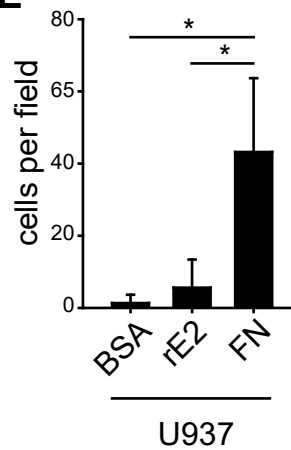**F**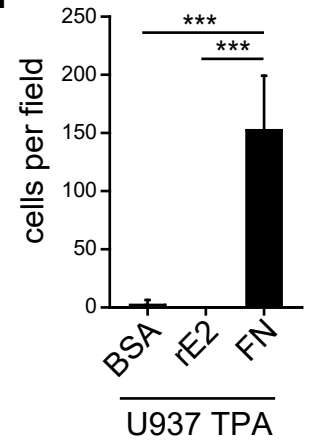

**Figure S9. EMILIN-2 does not directly impact on U937 cells activation, viability and adhesion.** **A**, Plots showing the expression of the CD11b activation marker in the monocytic U937 cell line in the presence of TPA and/or recombinant EMILIN-2 (rE2), as evaluated by flow cytometry. **B**, Representative plots of the Annexin V assays performed on U937 cells challenged with recombinant EMILIN-2 (rE2) or vehicle (PBS). Cells treated with H<sub>2</sub>O<sub>2</sub> were used as positive control. **C**, Percentage of Annexin V positive U937 cells in the presence of recombinant EMILIN-2 (rE2) or vehicle (PBS), as assessed in C. **D**, Percentage of U937 cell viability upon treatment with recombinant EMILIN-2 (rE2) or vehicle (PBS), as assessed by MTT assay. **E**, Graph reporting the number of U937 cells adhered on wells coated with EMILIN-2 (rE2), BSA or fibronectin (FN). **F**, Graph reporting the number of TPA-activated U937 cells adhered on wells coated with EMILIN-2 (rE2), BSA or fibronectin (FN). Graphs represent the mean  $\pm$  SD of at least three independent experiments. In C and D, *P* values were obtained with the paired Student's *t*-test; in E and F, *P* values were obtained using the one-way ANOVA test; \**P*<0.05, \*\*\**P*<0.001, n.s.: *P*>0.05.

**Figure S10**

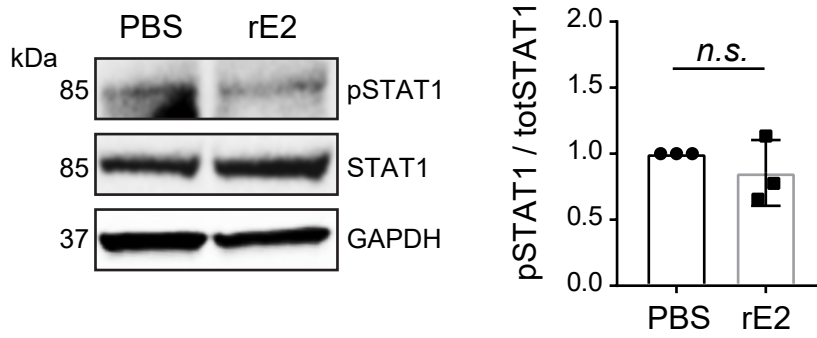

**Figure S10. EMILIN-2 does not affect STAT1 phosphorylation.** Representative Western blot (left) and quantification (right) of pSTAT1 in TPA-activated THP-1 cells challenged with recombinant EMILIN-2 (rE2) or vehicle (PBS); n=3. The graph represents the mean  $\pm$  SD; the  $P$  value was obtained using the paired Student's t-test; n.s.:  $P > 0.05$ .

## Figure S11

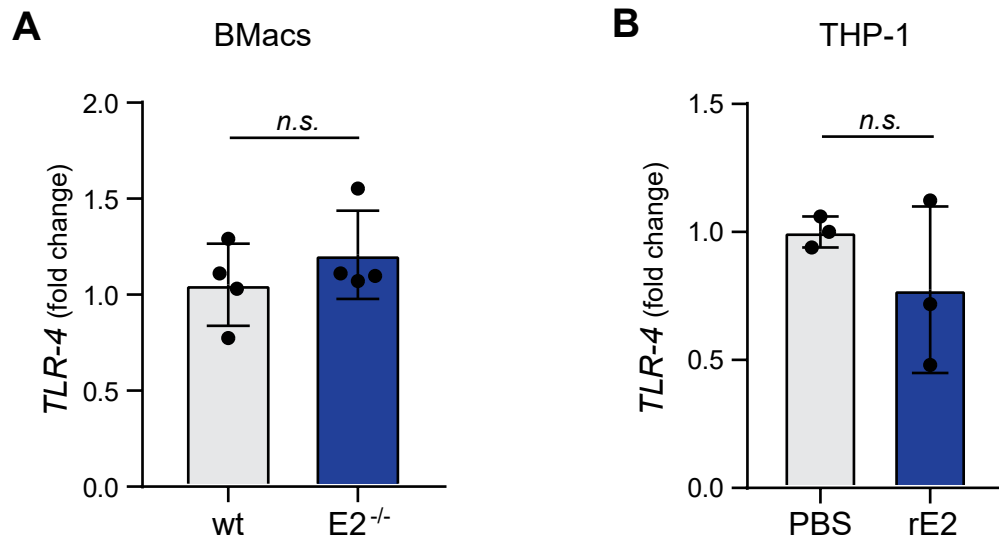

**Figure S11. EMILIN-2 does not alter the expression of *TLR-4*.** **A**, qPCR analyses of *TLR-4* expression, relative to that of *GAPDH*, in bone marrow-derived macrophages from *wild type* (wt) and *Emilin-2*<sup>-/-</sup> (E2<sup>-/-</sup>) mice; n=4. **B**, qPCR analyses of *TLR-4* expression, relative to that of *GAPDH*, in TPA-activated THP-1 cells treated with recombinant EMILIN-2 (rE2) or vehicle (PBS); n=3. Graphs represent the mean ± SD of at least three independent experiments; *P* values were obtained with the paired Student's t-test; n.s.: *P*>0.05.

Figure S12

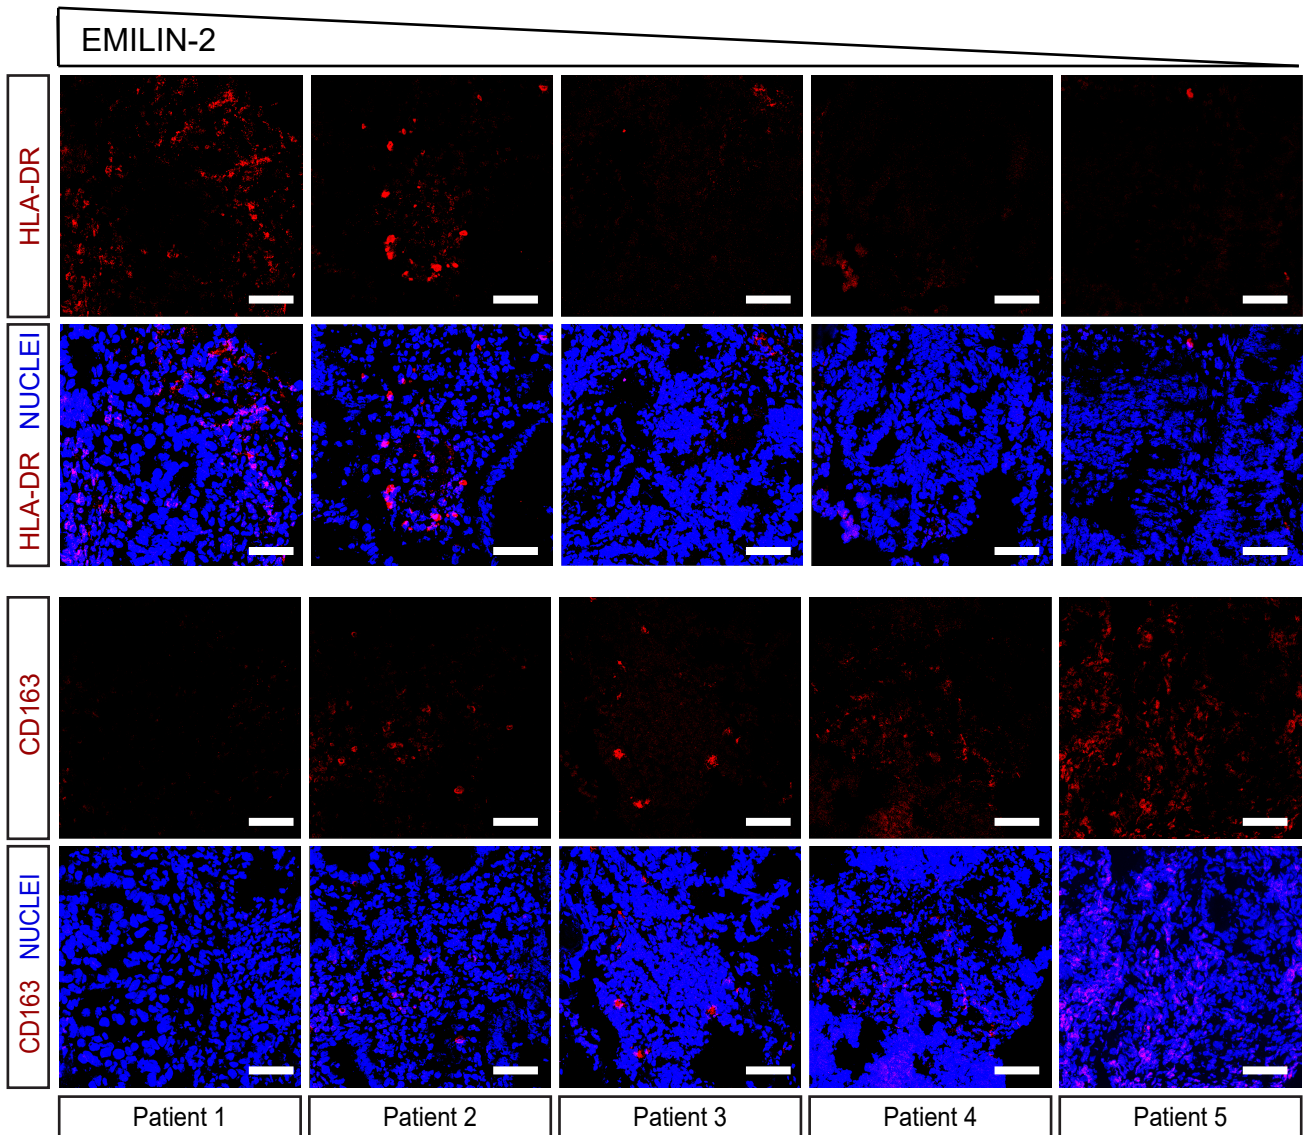

**Figure S12. EMILIN-2 associates with the expression of the M1 and M2 markers in CRC patients.** Representative images of immunofluorescence analyses of HLA-DR (red, top panel) and CD163 (red, low panel) in five patients displaying different EMILIN-2 expression levels (from high to low, as indicated); blue: nuclei, scale bar=50  $\mu$ m.
